# Supplementary material for: Artificial RNA Motifs Expand the Programmable Assembly between RNA Modules of a Bimolecular Ribozyme Leading to Application to RNA Nanostructure Design
Source: PubMed Central journal article supplement (PMC5745442; doi:10.3390/biology6040037), 2017-10-30
Supplement: biology-06-00037-s001.pdf [file biology-06-00037-s001.pdf]

Supporting Information

**Artificial RNA motifs expand programmable assembly between RNA modules of a bimolecular ribozyme leading to application to RNA nanostructure design**

Md. Motiar Rahman, Shigeyoshi Matsumura and Yoshiya Ikawa

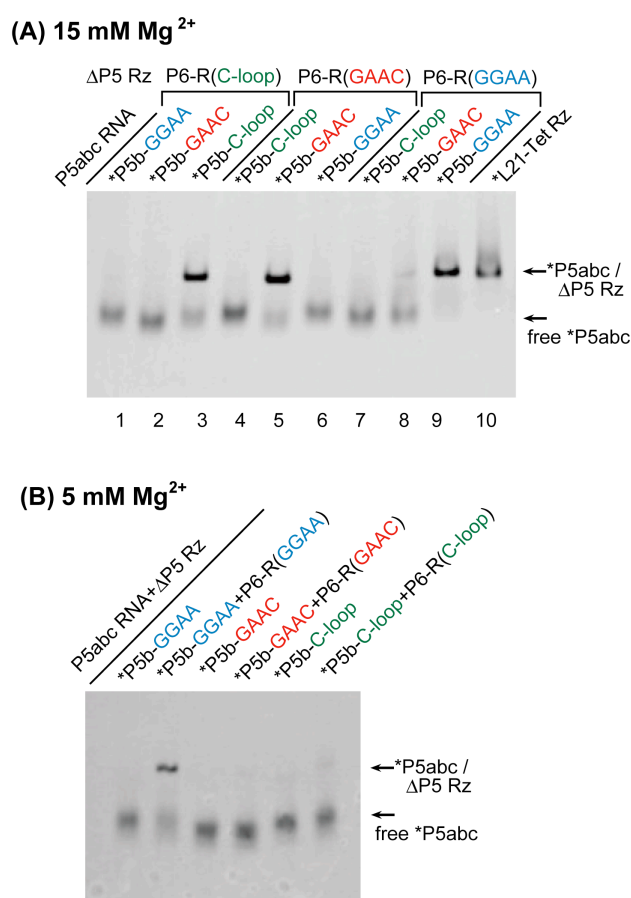

**Figure S1**

Electrophoretic mobility shift assay of P5abc/ΔP5 complexes in the presence of 15 mM Mg<sup>2+</sup> (A) and 5 mM Mg<sup>2+</sup> (B). L21-Tet Rz RNA (the parental unimolecular ribozyme from which the P5abc/ΔP5 complex was derived) and P5b-GGAA RNA were used as size markers for the complex and free-P5abc RNA, respectively. Asterisks indicate RNAs labeled with the BODIPY fluorophore.

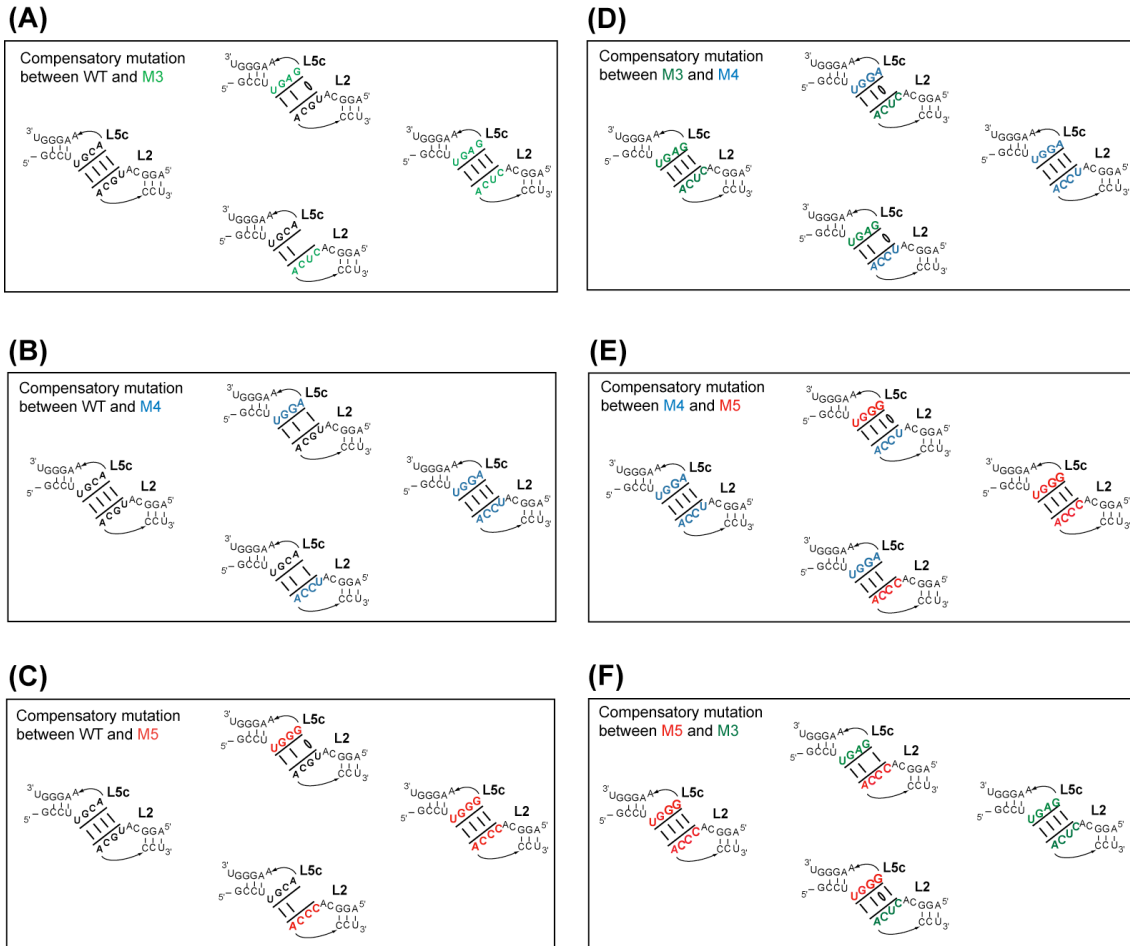

**Figure S2**

Possible base pairs between matched and mismatched combinations of P5c and P2. L5c and L2 indicate the loop regions of P5c and P2 elements, respectively.

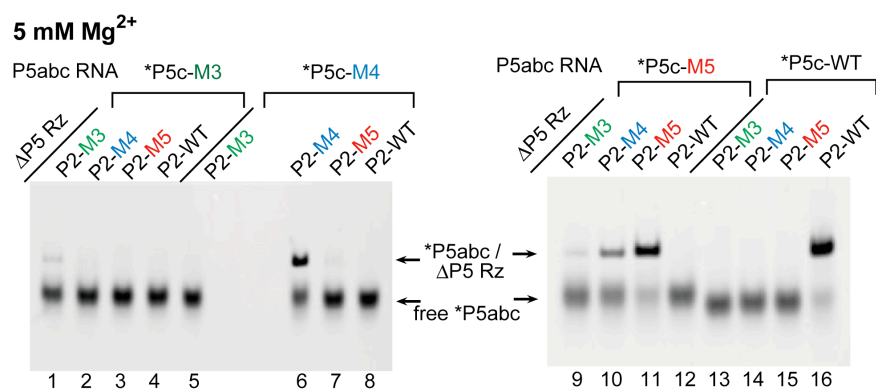

**Figure S3**

Electrophoretic mobility shift assay of P5abc/ $\Delta$ P5 complexes in the presence of 5 mM Mg<sup>2+</sup>. Asterisks indicate RNAs labeled with the BODIPY fluorophore.

**Table S1**

Effects of P5b-P6 interactions on observed rate constants of the bimolecular ribozymes.

| P6 in $\Delta$ P5 ribozyme | P5b in P5abc RNA | $k_{\text{obs}}$ (min <sup>-1</sup> ) |
|----------------------------|------------------|---------------------------------------|
| R(C-loop)                  | C-loop           | 0.02                                  |
| R(GAAC)                    | GAAC             | 0.04                                  |
| R(GGAA)                    | GGAA             | 0.34                                  |
| R(GGAA)                    | GAAC             | 0.02                                  |

**Table S2**

Effects of P5c-P2 interactions on observed rate constants of the bimolecular ribozymes.

| P2 in $\Delta$ P5 ribozyme | P5c in P5abc RNA | $k_{\text{obs}}$ (min <sup>-1</sup> ) |
|----------------------------|------------------|---------------------------------------|
| WT                         | WT               | 0.32                                  |
| M5                         | M5               | 0.31                                  |
| M4                         | M4               | 0.16                                  |
| M3                         | M3               | 0.03                                  |
| M4                         | M5               | 0.069                                 |
| M5                         | M4               | 0.076                                 |
